# Supplementary material for: Hexakis-2-(β-carboxyethenylphenoxy)cyclotriphosphazene: Synthesis, Properties, Modeling Structure
Source: MDPI journal article supplement (doi:10.3390/molecules28186571), 2023-09-11
Supplement: s1 [file s1]

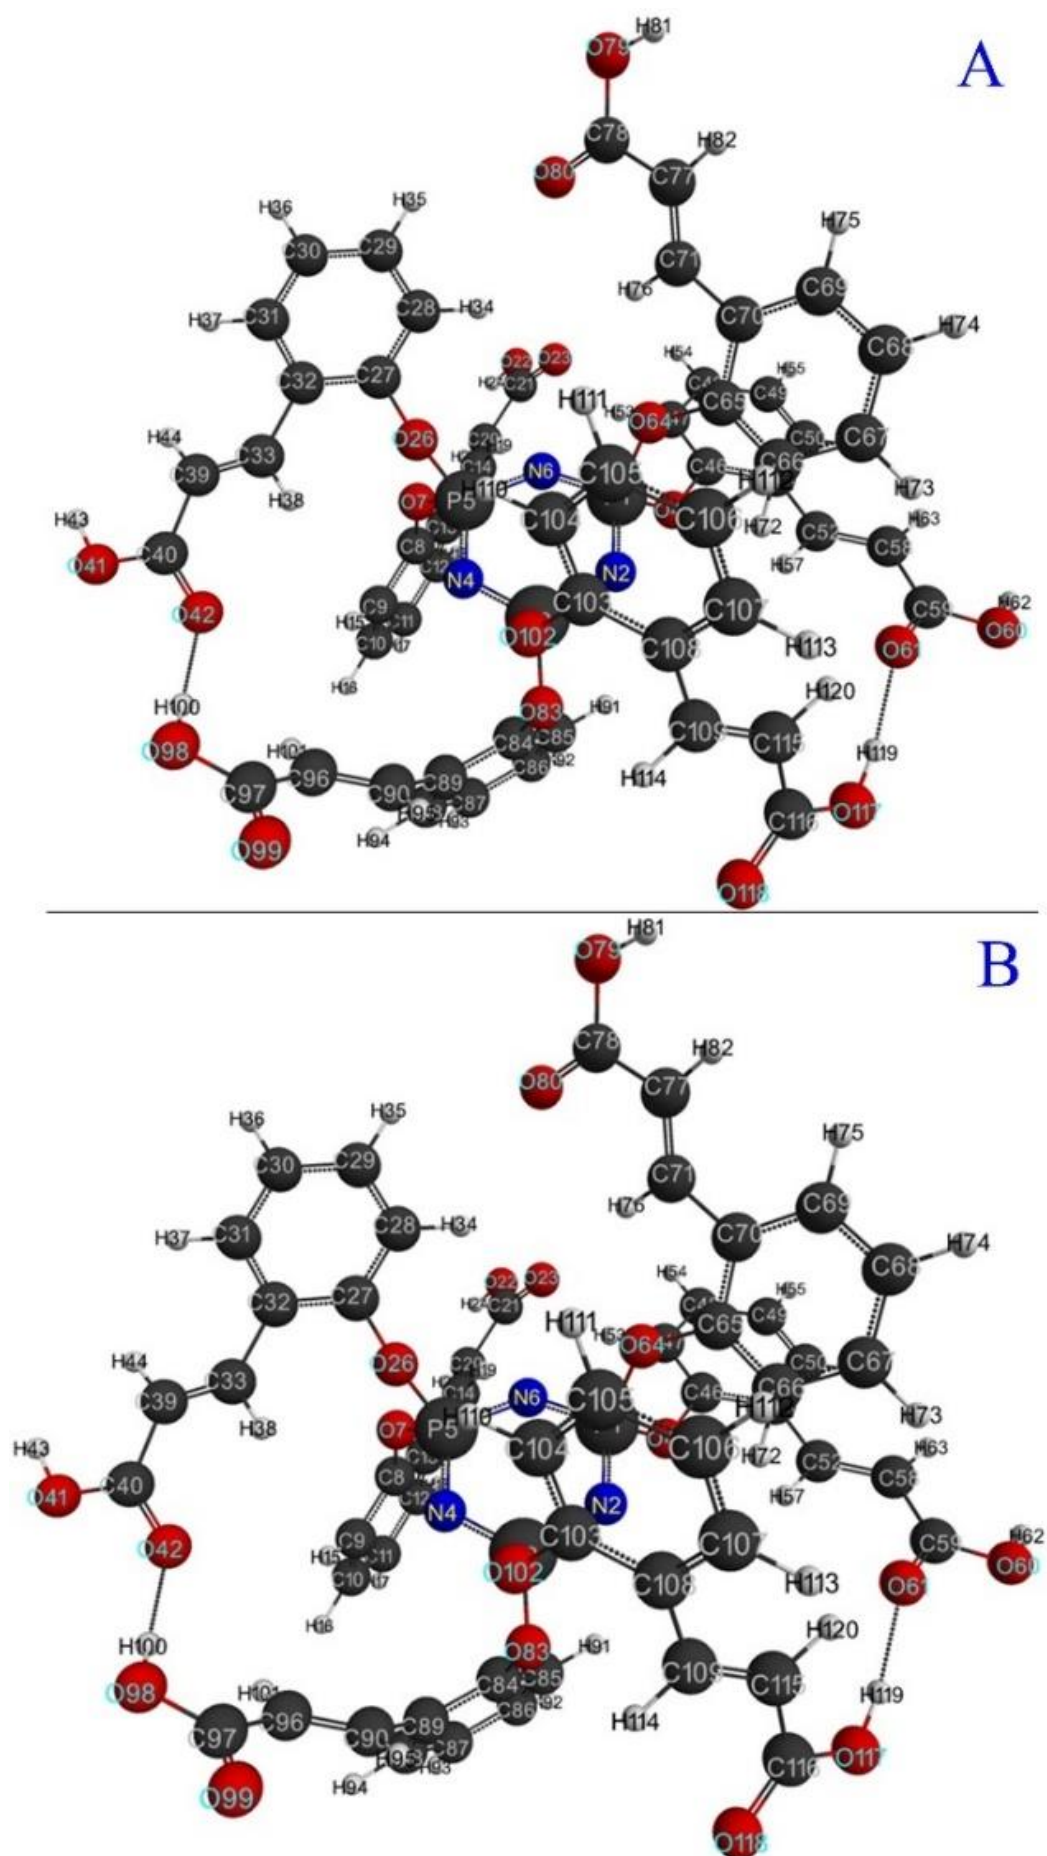

**Figure S1.** Geometrical and electronic structure of the 2-CEPP molecule obtained by ab initio (A) and DFT (B).

**Table S1.** Optimized bond lengths, bond angles, and charges on atoms of the 2-CEPP molecule obtained by the ab initio method.

| Bond lengths | R, Å | Bond angles       | Degree | Atom  | Charges on atoms of a molecule |
|--------------|------|-------------------|--------|-------|--------------------------------|
| N(2)-P(1)    | 1.57 | P(1)-N(2)-P(3)    | 125    | P(1)  | +1.713                         |
| P(3)-N(2)    | 1.58 | N(2)-P(3)-N(4)    | 114    | N(2)  | -1.012                         |
| N(4)-P(3)    | 1.58 | P(3)-N(4)-P(5)    | 124    | P(3)  | +1.732                         |
| P(5)-N(4)    | 1.57 | N(2)-P(1)-N(6)    | 116    | N(4)  | -0.982                         |
| N(6)-P(1)    | 1.57 | N(4)-P(5)-O(7)    | 113    | P(5)  | +1.71                          |
| O(7)-P(5)    | 1.58 | P(5)-O(7)-C(8)    | 132    | N(6)  | -0.99                          |
| C(8)-O(7)    | 1.37 | O(7)-C(8)-C(9)    | 118    | O(7)  | -0.734                         |
| C(9)-C(8)    | 1.38 | C(13)-C(8)-C(9)   | 122    | C(8)  | +0.271                         |
| C(10)-C(9)   | 1.38 | C(8)-C(9)-C(10)   | 119    | C(9)  | -0.07                          |
| C(11)-C(10)  | 1.39 | C(9)-C(10)-C(11)  | 120    | C(10) | -0.081                         |
| C(12)-C(11)  | 1.38 | C(13)-C(12)-C(11) | 121    | C(11) | -0.087                         |
| C(12)-C(13)  | 1.40 | C(10)-C(11)-C(12) | 120    | C(12) | -0.061                         |
| C(13)-C(8)   | 1.39 | C(8)-C(13)-C(12)  | 117    | C(13) | -0.10                          |
| C(14)-C(13)  | 1.47 | C(14)-C(13)-C(12) | 122    | C(14) | +0.03                          |
| H(15)-C(9)   | 1.07 | O(7)-C(8)-C(13)   | 119    | H(15) | +0.166                         |
| H(16)-C(10)  | 1.07 | C(8)-C(13)-C(14)  | 121    | H(16) | +0.106                         |
| H(17)-C(11)  | 1.07 | C(8)-C(9)-H(15)   | 119    | H(17) | +0.10                          |
| H(18)-C(12)  | 1.07 | C(9)-C(10)-H(16)  | 120    | H(18) | +0.098                         |
| H(19)-C(14)  | 1.07 | C(10)-C(11)-H(17) | 120    | H(19) | +0.202                         |
| C(20)-C(14)  | 1.33 | C(11)-C(12)-H(18) | 119    | C(20) | -0.337                         |
| C(21)-C(20)  | 1.49 | C(13)-C(12)-H(18) | 119    | C(21) | +0.639                         |
| O(22)-C(21)  | 1.33 | C(13)-C(14)-H(19) | 117    | O(22) | -0.39                          |
| O(23)-C(21)  | 1.18 | C(13)-C(14)-C(20) | 125    | O(23) | -0.466                         |
| H(24)-O(22)  | 0.94 | C(14)-C(20)-C(21) | 120    | H(24) | +0.262                         |
| H(25)-C(20)  | 1.08 | C(20)-C(21)-O(22) | 115    | H(25) | +0.098                         |
| O(26)-P(5)   | 1.58 | O(23)-C(21)-O(22) | 120    | O(26) | -0.714                         |
| C(27)-O(26)  | 1.37 | C(20)-C(21)-O(23) | 125    | C(27) | +0.293                         |
| C(28)-C(27)  | 1.38 | C(21)-O(22)-H(24) | 112    | C(28) | -0.095                         |
| C(29)-C(28)  | 1.38 | C(14)-C(20)-H(25) | 122    | C(29) | -0.084                         |
| C(30)-C(29)  | 1.39 | N(4)-P(5)-O(26)   | 107    | C(30) | -0.09                          |
| C(31)-C(30)  | 1.38 | P(5)-O(26)-C(27)  | 130    | C(31) | -0.048                         |
| C(31)-C(32)  | 1.39 | O(26)-C(27)-C(28) | 119    | C(32) | -0.085                         |
| C(32)-C(27)  | 1.39 | C(32)-C(27)-C(28) | 122    | C(33) | +0.021                         |
| C(33)-C(32)  | 1.47 | C(27)-C(28)-C(29) | 119    | H(34) | +0.158                         |
| H(34)-C(28)  | 1.07 | C(28)-C(29)-C(30) | 120    | H(35) | +0.139                         |
| H(35)-C(29)  | 1.07 | C(32)-C(31)-C(30) | 121    | H(36) | +0.101                         |
| H(36)-C(30)  | 1.07 | C(29)-C(30)-C(31) | 120    | H(37) | +0.093                         |
| H(37)-C(31)  | 1.07 | C(27)-C(32)-C(31) | 117    | H(38) | +0.171                         |
| H(38)-C(33)  | 1.07 | C(33)-C(32)-C(31) | 123    | C(39) | -0.331                         |
| C(39)-C(33)  | 1.33 | O(26)-C(27)-C(32) | 119    | C(40) | +0.669                         |
| C(40)-C(39)  | 1.48 | C(27)-C(32)-C(33) | 120    | O(41) | -0.382                         |
| O(41)-C(40)  | 1.33 | C(27)-C(28)-H(34) | 120    | O(42) | -0.524                         |
| O(42)-C(40)  | 1.19 | C(28)-C(29)-H(35) | 119    | H(43) | +0.267                         |
| O(42)-H(100) | 1.96 | C(29)-C(30)-H(36) | 120    | H(44) | +0.101                         |
| H(43)-O(41)  | 0.94 | C(30)-C(31)-H(37) | 119    | O(45) | -0.716                         |
| H(44)-C(39)  | 1.08 | C(32)-C(31)-H(37) | 119    | C(46) | +0.301                         |
| O(45)-P(1)   | 1.58 | C(32)-C(33)-H(38) | 116    | C(47) | -0.136                         |
| C(46)-O(45)  | 1.37 | C(32)-C(33)-C(39) | 127    | C(48) | -0.08                          |
| C(46)-C(51)  | 1.39 | C(33)-C(39)-C(40) | 120    | C(49) | -0.092                         |

|              |      |                   |     |        |        |
|--------------|------|-------------------|-----|--------|--------|
| C(47)-C(46)  | 1.38 | C(39)-C(40)-O(41) | 116 | C(50)  | -0.04  |
| C(48)-C(47)  | 1.38 | O(42)-C(40)-O(41) | 120 | C(51)  | -0.122 |
| C(49)-C(48)  | 1.39 | C(39)-C(40)-O(42) | 124 | C(52)  | +0.034 |
| C(50)-C(49)  | 1.38 | C(40)-O(41)-H(43) | 112 | H(53)  | +0.189 |
| C(51)-C(50)  | 1.39 | C(33)-C(39)-H(44) | 122 | H(54)  | +0.137 |
| C(52)-C(51)  | 1.47 | N(2)-P(1)-O(45)   | 106 | H(55)  | +0.102 |
| H(53)-C(47)  | 1.07 | C(51)-C(46)-O(45) | 117 | H(56)  | +0.093 |
| H(54)-C(48)  | 1.07 | P(1)-O(45)-C(46)  | 132 | H(57)  | +0.173 |
| H(55)-C(49)  | 1.07 | C(50)-C(51)-C(46) | 117 | C(58)  | -0.33  |
| H(56)-C(50)  | 1.07 | C(52)-C(51)-C(46) | 119 | C(59)  | +0.669 |
| H(57)-C(52)  | 1.07 | O(45)-C(46)-C(47) | 121 | O(60)  | -0.38  |
| C(58)-C(52)  | 1.33 | C(51)-C(46)-C(47) | 122 | O(61)  | -0.526 |
| C(59)-C(58)  | 1.48 | C(46)-C(47)-C(48) | 119 | H(62)  | +0.268 |
| O(60)-C(59)  | 1.33 | C(47)-C(48)-C(49) | 120 | H(63)  | +0.10  |
| O(61)-C(59)  | 1.19 | C(48)-C(49)-C(50) | 120 | O(64)  | -0.729 |
| O(61)-H(119) | 1.98 | C(49)-C(50)-C(51) | 121 | C(65)  | +0.34  |
| H(62)-O(60)  | 0.94 | C(50)-C(51)-C(52) | 123 | C(66)  | -0.151 |
| H(63)-C(58)  | 1.08 | C(46)-C(47)-H(53) | 121 | C(67)  | -0.075 |
| O(64)-P(1)   | 1.59 | C(47)-C(48)-H(54) | 119 | C(68)  | -0.098 |
| C(65)-O(64)  | 1.37 | C(48)-C(49)-H(55) | 120 | C(69)  | -0.049 |
| C(65)-C(70)  | 1.40 | C(49)-C(50)-H(56) | 119 | C(70)  | -0.143 |
| C(66)-C(65)  | 1.38 | C(51)-C(52)-H(57) | 116 | C(71)  | +0.047 |
| C(67)-C(66)  | 1.38 | C(51)-C(52)-C(58) | 128 | H(72)  | +0.196 |
| C(68)-C(67)  | 1.38 | C(52)-C(58)-C(59) | 119 | H(73)  | +0.114 |
| C(69)-C(68)  | 1.38 | C(58)-C(59)-O(60) | 116 | H(74)  | +0.10  |
| C(70)-C(69)  | 1.39 | O(61)-C(59)-O(60) | 120 | H(75)  | +0.096 |
| C(71)-C(70)  | 1.47 | C(58)-C(59)-O(61) | 124 | H(76)  | +0.178 |
| H(72)-C(66)  | 1.07 | C(59)-O(60)-H(62) | 112 | C(77)  | -0.339 |
| H(73)-C(67)  | 1.07 | C(52)-C(58)-H(63) | 123 | C(78)  | +0.64  |
| H(74)-C(68)  | 1.07 | N(2)-P(1)-O(64)   | 113 | O(79)  | -0.389 |
| H(75)-C(69)  | 1.07 | C(70)-C(65)-O(64) | 116 | O(80)  | -0.464 |
| H(76)-C(71)  | 1.07 | P(1)-O(64)-C(65)  | 134 | H(81)  | +0.261 |
| C(77)-C(71)  | 1.33 | C(69)-C(70)-C(65) | 118 | H(82)  | +0.098 |
| C(78)-C(77)  | 1.49 | C(71)-C(70)-C(65) | 119 | O(83)  | -0.711 |
| O(79)-C(78)  | 1.33 | O(64)-C(65)-C(66) | 122 | C(84)  | +0.297 |
| O(80)-C(78)  | 1.18 | C(70)-C(65)-C(66) | 122 | C(85)  | -0.079 |
| H(81)-O(79)  | 0.94 | C(65)-C(66)-C(67) | 119 | C(86)  | -0.078 |
| H(82)-C(77)  | 1.08 | C(66)-C(67)-C(68) | 121 | C(87)  | -0.089 |
| O(83)-P(3)   | 1.57 | C(67)-C(68)-C(69) | 120 | C(88)  | -0.075 |
| C(84)-O(83)  | 1.37 | C(68)-C(69)-C(70) | 121 | C(89)  | -0.066 |
| C(85)-C(84)  | 1.38 | C(69)-C(70)-C(71) | 123 | C(90)  | -0.023 |
| C(86)-C(85)  | 1.38 | C(65)-C(66)-H(72) | 120 | H(91)  | +0.123 |
| C(87)-C(86)  | 1.38 | C(66)-C(67)-H(73) | 119 | H(92)  | +0.102 |
| C(88)-C(87)  | 1.38 | C(67)-C(68)-H(74) | 120 | H(93)  | +0.097 |
| C(88)-C(89)  | 1.39 | C(68)-C(69)-H(75) | 119 | H(94)  | +0.106 |
| C(89)-C(84)  | 1.39 | C(70)-C(71)-H(76) | 116 | H(95)  | +0.164 |
| C(90)-C(89)  | 1.48 | C(70)-C(71)-C(77) | 127 | C(96)  | -0.281 |
| H(91)-C(85)  | 1.07 | C(71)-C(77)-C(78) | 120 | C(97)  | +0.593 |
| H(92)-C(86)  | 1.07 | C(77)-C(78)-O(79) | 115 | O(98)  | -0.41  |
| H(93)-C(87)  | 1.08 | O(80)-C(78)-O(79) | 120 | O(99)  | -0.453 |
| H(94)-C(88)  | 1.07 | C(77)-C(78)-O(80) | 125 | H(100) | +0.298 |
| H(95)-C(90)  | 1.08 | C(78)-O(79)-H(81) | 112 | H(101) | +0.114 |
| C(96)-C(90)  | 1.32 | C(71)-C(77)-H(82) | 122 | O(102) | -0.701 |

|               |      |                      |     |        |        |
|---------------|------|----------------------|-----|--------|--------|
| C(97)-C(96)   | 1.50 | N(2)-P(3)-O(83)      | 112 | C(103) | +0.293 |
| O(98)-C(97)   | 1.32 | P(3)-O(83)-C(84)     | 130 | C(104) | -0.081 |
| O(99)-C(97)   | 1.18 | O(83)-C(84)-C(85)    | 119 | C(105) | -0.082 |
| H(100)-O(98)  | 0.95 | C(89)-C(84)-C(85)    | 122 | C(106) | -0.081 |
| H(101)-C(96)  | 1.08 | C(84)-C(85)-C(86)    | 119 | C(107) | -0.067 |
| O(102)-P(3)   | 1.58 | C(85)-C(86)-C(87)    | 120 | C(108) | -0.07  |
| C(103)-O(102) | 1.38 | C(89)-C(88)-C(87)    | 121 | C(109) | -0.034 |
| C(104)-C(103) | 1.38 | C(86)-C(87)-C(88)    | 120 | H(110) | +0.123 |
| C(105)-C(104) | 1.38 | C(84)-C(89)-C(88)    | 117 | H(111) | +0.103 |
| C(106)-C(105) | 1.38 | C(90)-C(89)-C(88)    | 122 | H(112) | +0.098 |
| C(107)-C(106) | 1.38 | O(83)-C(84)-C(89)    | 118 | H(113) | +0.104 |
| C(107)-C(108) | 1.39 | C(84)-C(89)-C(90)    | 121 | H(114) | +0.169 |
| C(108)-C(103) | 1.39 | C(84)-C(85)-H(91)    | 119 | C(115) | -0.302 |
| C(109)-C(108) | 1.48 | C(85)-C(86)-H(92)    | 120 | C(116) | +0.599 |
| H(110)-C(104) | 1.07 | C(86)-C(87)-H(93)    | 120 | O(117) | -0.412 |
| H(111)-C(105) | 1.07 | C(87)-C(88)-H(94)    | 120 | O(118) | -0.454 |
| H(112)-C(106) | 1.07 | C(89)-C(88)-H(94)    | 119 | H(119) | +0.297 |
| H(113)-C(107) | 1.07 | C(89)-C(90)-H(95)    | 117 | H(120) | +0.118 |
| H(114)-C(109) | 1.08 | C(89)-C(90)-C(96)    | 125 |        |        |
| C(115)-C(109) | 1.32 | C(90)-C(96)-C(97)    | 120 |        |        |
| C(116)-C(115) | 1.49 | C(96)-C(97)-O(98)    | 115 |        |        |
| O(117)-C(116) | 1.32 | O(99)-C(97)-O(98)    | 121 |        |        |
| O(118)-C(116) | 1.18 | C(96)-C(97)-O(99)    | 123 |        |        |
| H(119)-O(117) | 0.95 | C(97)-O(98)-H(100)   | 113 |        |        |
| H(120)-C(115) | 1.08 | C(90)-C(96)-H(101)   | 122 |        |        |
|               |      | N(2)-P(3)-O(102)     | 109 |        |        |
|               |      | P(3)-O(102)-C(103)   | 129 |        |        |
|               |      | O(102)-C(103)-C(104) | 118 |        |        |
|               |      | C(108)-C(103)-C(104) | 122 |        |        |
|               |      | C(103)-C(104)-C(105) | 119 |        |        |
|               |      | C(104)-C(105)-C(106) | 120 |        |        |
|               |      | C(108)-C(107)-C(106) | 121 |        |        |
|               |      | C(105)-C(106)-C(107) | 120 |        |        |
|               |      | C(103)-C(108)-C(107) | 117 |        |        |
|               |      | C(109)-C(108)-C(107) | 122 |        |        |
|               |      | O(102)-C(103)-C(108) | 120 |        |        |
|               |      | C(103)-C(108)-C(109) | 121 |        |        |
|               |      | C(103)-C(104)-H(110) | 119 |        |        |
|               |      | C(104)-C(105)-H(111) | 120 |        |        |
|               |      | C(105)-C(106)-H(112) | 120 |        |        |
|               |      | C(106)-C(107)-H(113) | 120 |        |        |
|               |      | C(108)-C(107)-H(113) | 119 |        |        |
|               |      | C(108)-C(109)-H(114) | 117 |        |        |
|               |      | C(108)-C(109)-C(115) | 125 |        |        |
|               |      | C(109)-C(115)-C(116) | 120 |        |        |
|               |      | C(115)-C(116)-O(117) | 116 |        |        |
|               |      | O(118)-C(116)-O(117) | 121 |        |        |
|               |      | C(115)-C(116)-O(118) | 123 |        |        |
|               |      | C(116)-O(117)-H(119) | 114 |        |        |
|               |      | C(109)-C(115)-H(120) | 122 |        |        |

**Table S2.** Optimized bond lengths, bond angles, and charges on atoms of the 2-CEPP molecule obtained by DFT method.

| Bond lengths | R, Å | Bond angles       | Degree | Atom  | Charges on atoms of a molecule |
|--------------|------|-------------------|--------|-------|--------------------------------|
| N(2)-P(1)    | 1.58 | P(1)-N(2)-P(3)    | 122    | P(1)  | +1.318                         |
| P(3)-N(2)    | 1.60 | N(2)-P(3)-N(4)    | 116    | N(2)  | -0.785                         |
| N(4)-P(3)    | 1.60 | P(3)-N(4)-P(5)    | 122    | P(3)  | +1.322                         |
| P(5)-N(4)    | 1.58 | N(2)-P(1)-N(6)    | 118    | N(4)  | -0.752                         |
| N(6)-P(1)    | 1.59 | N(4)-P(5)-O(7)    | 113    | P(5)  | +1.326                         |
| O(7)-P(5)    | 1.60 | P(5)-O(7)-C(8)    | 128    | N(6)  | -0.769                         |
| C(8)-O(7)    | 1.38 | O(7)-C(8)-C(9)    | 118    | O(7)  | -0.579                         |
| C(9)-C(8)    | 1.39 | C(13)-C(8)-C(9)   | 122    | C(8)  | +0.163                         |
| C(10)-C(9)   | 1.39 | C(8)-C(9)-C(10)   | 119    | C(9)  | -0.046                         |
| C(11)-C(10)  | 1.39 | C(9)-C(10)-C(11)  | 120    | C(10) | -0.108                         |
| C(12)-C(11)  | 1.38 | C(13)-C(12)-C(11) | 122    | C(11) | -0.087                         |
| C(12)-C(13)  | 1.40 | C(10)-C(11)-C(12) | 120    | C(12) | -0.048                         |
| C(13)-C(8)   | 1.40 | C(8)-C(13)-C(12)  | 117    | C(13) | -0.089                         |
| C(14)-C(13)  | 1.46 | C(14)-C(13)-C(12) | 123    | C(14) | -0.007                         |
| H(15)-C(9)   | 1.08 | O(7)-C(8)-C(13)   | 119    | H(15) | +0.179                         |
| H(16)-C(10)  | 1.08 | C(8)-C(13)-C(14)  | 120    | H(16) | +0.11                          |
| H(17)-C(11)  | 1.08 | C(8)-C(9)-H(15)   | 119    | H(17) | +0.104                         |
| H(18)-C(12)  | 1.08 | C(9)-C(10)-H(16)  | 119    | H(18) | +0.099                         |
| H(19)-C(14)  | 1.09 | C(10)-C(11)-H(17) | 120    | H(19) | +0.189                         |
| C(20)-C(14)  | 1.34 | C(11)-C(12)-H(18) | 119    | C(20) | -0.298                         |
| C(21)-C(20)  | 1.48 | C(13)-C(12)-H(18) | 119    | C(21) | +0.473                         |
| O(22)-C(21)  | 1.35 | C(13)-C(14)-H(19) | 117    | O(22) | -0.313                         |
| O(23)-C(21)  | 1.20 | C(13)-C(14)-C(20) | 126    | O(23) | -0.368                         |
| H(24)-O(22)  | 0.96 | C(14)-C(20)-C(21) | 120    | H(24) | +0.249                         |
| H(25)-C(20)  | 1.09 | C(20)-C(21)-O(22) | 116    | H(25) | +0.108                         |
| O(26)-P(5)   | 1.61 | O(23)-C(21)-O(22) | 120    | O(26) | -0.555                         |
| C(27)-O(26)  | 1.38 | C(20)-C(21)-O(23) | 125    | C(27) | +0.17                          |
| C(27)-C(32)  | 1.40 | C(21)-O(22)-H(24) | 110    | C(28) | -0.066                         |
| C(28)-C(27)  | 1.38 | C(14)-C(20)-H(25) | 121    | C(29) | -0.096                         |
| C(29)-C(28)  | 1.39 | N(4)-P(5)-O(26)   | 106    | C(30) | -0.095                         |
| C(30)-C(29)  | 1.39 | C(32)-C(27)-O(26) | 119    | C(31) | -0.033                         |
| C(31)-C(30)  | 1.38 | P(5)-O(26)-C(27)  | 127    | C(32) | -0.065                         |
| C(32)-C(31)  | 1.40 | C(31)-C(32)-C(27) | 117    | C(33) | -0.037                         |
| C(33)-C(32)  | 1.45 | C(33)-C(32)-C(27) | 119    | H(34) | +0.16                          |
| H(34)-C(28)  | 1.08 | O(26)-C(27)-C(28) | 119    | H(35) | +0.136                         |
| H(35)-C(29)  | 1.08 | C(32)-C(27)-C(28) | 122    | H(36) | +0.107                         |
| H(36)-C(30)  | 1.08 | C(27)-C(28)-C(29) | 119    | H(37) | +0.097                         |
| H(37)-C(31)  | 1.08 | C(28)-C(29)-C(30) | 120    | H(38) | +0.175                         |
| H(38)-C(33)  | 1.09 | C(29)-C(30)-C(31) | 120    | C(39) | -0.28                          |
| C(39)-C(33)  | 1.34 | C(30)-C(31)-C(32) | 121    | C(40) | +0.498                         |
| C(40)-C(39)  | 1.47 | C(31)-C(32)-C(33) | 124    | O(41) | -0.302                         |
| O(41)-C(40)  | 1.34 | C(27)-C(28)-H(34) | 120    | O(42) | -0.427                         |
| O(42)-C(40)  | 1.21 | C(28)-C(29)-H(35) | 118    | H(43) | +0.256                         |
| O(42)-H(100) | 1.84 | C(29)-C(30)-H(36) | 120    | H(44) | +0.114                         |
| H(43)-O(41)  | 0.96 | C(30)-C(31)-H(37) | 119    | O(45) | -0.553                         |
| H(44)-C(39)  | 1.09 | C(32)-C(33)-H(38) | 116    | C(46) | +0.178                         |
| O(45)-P(1)   | 1.60 | C(32)-C(33)-C(39) | 128    | C(47) | -0.097                         |
| C(46)-O(45)  | 1.38 | C(33)-C(39)-C(40) | 119    | C(48) | -0.092                         |
| C(46)-C(51)  | 1.41 | C(39)-C(40)-O(41) | 116    | C(49) | -0.096                         |

|              |      |                   |     |        |        |
|--------------|------|-------------------|-----|--------|--------|
| C(47)-C(46)  | 1.38 | O(42)-C(40)-O(41) | 119 | C(50)  | -0.03  |
| C(48)-C(47)  | 1.39 | C(39)-C(40)-O(42) | 124 | C(51)  | -0.109 |
| C(49)-C(48)  | 1.39 | C(40)-O(41)-H(43) | 110 | C(52)  | -0.011 |
| C(50)-C(49)  | 1.38 | C(33)-C(39)-H(44) | 122 | H(53)  | +0.186 |
| C(51)-C(50)  | 1.40 | N(2)-P(1)-O(45)   | 104 | H(54)  | +0.137 |
| C(52)-C(51)  | 1.45 | C(51)-C(46)-O(45) | 117 | H(55)  | +0.108 |
| H(53)-C(47)  | 1.08 | P(1)-O(45)-C(46)  | 128 | H(56)  | +0.097 |
| H(54)-C(48)  | 1.08 | C(50)-C(51)-C(46) | 117 | H(57)  | +0.17  |
| H(55)-C(49)  | 1.08 | C(52)-C(51)-C(46) | 119 | C(58)  | -0.282 |
| H(56)-C(50)  | 1.08 | O(45)-C(46)-C(47) | 121 | C(59)  | +0.497 |
| H(57)-C(52)  | 1.09 | C(51)-C(46)-C(47) | 122 | O(60)  | -0.30  |
| C(58)-C(52)  | 1.34 | C(46)-C(47)-C(48) | 119 | O(61)  | -0.431 |
| C(59)-C(58)  | 1.47 | C(47)-C(48)-C(49) | 120 | H(62)  | +0.256 |
| O(60)-C(59)  | 1.34 | C(48)-C(49)-C(50) | 120 | H(63)  | +0.114 |
| O(61)-C(59)  | 1.21 | C(49)-C(50)-C(51) | 121 | O(64)  | -0.57  |
| O(61)-H(119) | 1.84 | C(50)-C(51)-C(52) | 124 | C(65)  | +0.258 |
| H(62)-O(60)  | 0.96 | C(46)-C(47)-H(53) | 121 | C(66)  | -0.158 |
| H(63)-C(58)  | 1.09 | C(47)-C(48)-H(54) | 118 | C(67)  | -0.085 |
| O(64)-P(1)   | 1.62 | C(48)-C(49)-H(55) | 120 | C(68)  | -0.10  |
| C(65)-O(64)  | 1.37 | C(49)-C(50)-H(56) | 120 | C(69)  | -0.036 |
| C(65)-C(70)  | 1.41 | C(51)-C(52)-H(57) | 116 | C(70)  | -0.147 |
| C(66)-C(65)  | 1.39 | C(51)-C(52)-C(58) | 129 | C(71)  | -0.004 |
| C(67)-C(66)  | 1.39 | C(52)-C(58)-C(59) | 119 | H(72)  | +0.215 |
| C(68)-C(67)  | 1.39 | C(58)-C(59)-O(60) | 117 | H(73)  | +0.122 |
| C(69)-C(68)  | 1.38 | O(61)-C(59)-O(60) | 119 | H(74)  | +0.104 |
| C(70)-C(69)  | 1.40 | C(58)-C(59)-O(61) | 124 | H(75)  | +0.098 |
| C(71)-C(70)  | 1.45 | C(59)-O(60)-H(62) | 110 | H(76)  | +0.183 |
| H(72)-C(66)  | 1.08 | C(52)-C(58)-H(63) | 123 | C(77)  | -0.302 |
| H(73)-C(67)  | 1.08 | N(2)-P(1)-O(64)   | 113 | C(78)  | +0.47  |
| H(74)-C(68)  | 1.08 | C(70)-C(65)-O(64) | 116 | O(79)  | -0.311 |
| H(75)-C(69)  | 1.08 | P(1)-O(64)-C(65)  | 130 | O(80)  | -0.364 |
| H(76)-C(71)  | 1.09 | C(69)-C(70)-C(65) | 117 | H(81)  | +0.248 |
| C(77)-C(71)  | 1.34 | C(71)-C(70)-C(65) | 119 | H(82)  | +0.108 |
| C(78)-C(77)  | 1.48 | O(64)-C(65)-C(66) | 123 | O(83)  | -0.549 |
| O(79)-C(78)  | 1.35 | C(70)-C(65)-C(66) | 122 | C(84)  | +0.168 |
| O(80)-C(78)  | 1.20 | C(65)-C(66)-C(67) | 119 | C(85)  | -0.047 |
| H(81)-O(79)  | 0.96 | C(66)-C(67)-C(68) | 121 | C(86)  | -0.092 |
| H(82)-C(77)  | 1.09 | C(67)-C(68)-C(69) | 120 | C(87)  | -0.087 |
| O(83)-P(3)   | 1.60 | C(68)-C(69)-C(70) | 121 | C(88)  | -0.083 |
| C(84)-O(83)  | 1.38 | C(69)-C(70)-C(71) | 124 | C(89)  | -0.058 |
| C(84)-C(89)  | 1.40 | C(65)-C(66)-H(72) | 120 | C(90)  | -0.025 |
| C(85)-C(84)  | 1.38 | C(66)-C(67)-H(73) | 119 | H(91)  | +0.132 |
| C(86)-C(85)  | 1.39 | C(67)-C(68)-H(74) | 120 | H(92)  | +0.108 |
| C(87)-C(86)  | 1.39 | C(68)-C(69)-H(75) | 120 | H(93)  | +0.101 |
| C(88)-C(87)  | 1.39 | C(70)-C(71)-H(76) | 116 | H(94)  | +0.111 |
| C(89)-C(88)  | 1.40 | C(70)-C(71)-C(77) | 128 | H(95)  | +0.164 |
| C(90)-C(89)  | 1.46 | C(71)-C(77)-C(78) | 119 | C(96)  | -0.278 |
| H(91)-C(85)  | 1.08 | C(77)-C(78)-O(79) | 116 | C(97)  | +0.423 |
| H(92)-C(86)  | 1.08 | O(80)-C(78)-O(79) | 120 | O(98)  | -0.328 |
| H(93)-C(87)  | 1.08 | C(77)-C(78)-O(80) | 125 | O(99)  | -0.354 |
| H(94)-C(88)  | 1.09 | C(78)-O(79)-H(81) | 110 | H(100) | +0.268 |
| H(95)-C(90)  | 1.09 | C(71)-C(77)-H(82) | 122 | H(101) | +0.123 |
| C(96)-C(90)  | 1.34 | N(2)-P(3)-O(83)   | 112 | O(102) | -0.536 |

|               |      |                      |     |        |        |
|---------------|------|----------------------|-----|--------|--------|
| C(97)-C(96)   | 1.49 | C(89)-C(84)-O(83)    | 118 | C(103) | +0.176 |
| O(98)-C(97)   | 1.34 | P(3)-O(83)-C(84)     | 125 | C(104) | -0.057 |
| O(99)-C(97)   | 1.20 | C(88)-C(89)-C(84)    | 117 | C(105) | -0.092 |
| H(100)-O(98)  | 0.97 | C(90)-C(89)-C(84)    | 121 | C(106) | -0.085 |
| H(101)-C(96)  | 1.09 | O(83)-C(84)-C(85)    | 119 | C(107) | -0.063 |
| O(102)-P(3)   | 1.60 | C(89)-C(84)-C(85)    | 122 | C(108) | -0.075 |
| C(103)-O(102) | 1.38 | C(84)-C(85)-C(86)    | 119 | C(109) | -0.047 |
| C(103)-C(108) | 1.40 | C(85)-C(86)-C(87)    | 120 | H(110) | +0.126 |
| C(104)-C(103) | 1.39 | C(86)-C(87)-C(88)    | 120 | H(111) | +0.109 |
| C(105)-C(104) | 1.39 | C(87)-C(88)-C(89)    | 121 | H(112) | +0.103 |
| C(106)-C(105) | 1.39 | C(88)-C(89)-C(90)    | 122 | H(113) | +0.11  |
| C(107)-C(106) | 1.39 | C(84)-C(85)-H(91)    | 119 | H(114) | +0.175 |
| C(108)-C(107) | 1.40 | C(85)-C(86)-H(92)    | 120 | C(115) | -0.306 |
| C(109)-C(108) | 1.46 | C(86)-C(87)-H(93)    | 120 | C(116) | +0.433 |
| H(110)-C(104) | 1.08 | C(87)-C(88)-H(94)    | 120 | O(117) | -0.33  |
| H(111)-C(105) | 1.08 | C(89)-C(90)-H(95)    | 117 | O(118) | -0.357 |
| H(112)-C(106) | 1.08 | C(89)-C(90)-C(96)    | 125 | H(119) | +0.269 |
| H(113)-C(107) | 1.08 | C(90)-C(96)-C(97)    | 120 | H(120) | +0.134 |
| H(114)-C(109) | 1.09 | C(96)-C(97)-O(98)    | 116 |        |        |
| C(115)-C(109) | 1.34 | O(99)-C(97)-O(98)    | 121 |        |        |
| C(116)-C(115) | 1.49 | C(96)-C(97)-O(99)    | 123 |        |        |
| O(117)-C(116) | 1.34 | C(97)-O(98)-H(100)   | 111 |        |        |
| O(118)-C(116) | 1.20 | C(90)-C(96)-H(101)   | 121 |        |        |
| H(119)-O(117) | 0.97 | N(2)-P(3)-O(102)     | 109 |        |        |
| H(120)-C(115) | 1.09 | C(108)-C(103)-O(102) | 120 |        |        |
|               |      | P(3)-O(102)-C(103)   | 126 |        |        |
|               |      | C(107)-C(108)-C(103) | 117 |        |        |
|               |      | C(109)-C(108)-C(103) | 121 |        |        |
|               |      | O(102)-C(103)-C(104) | 117 |        |        |
|               |      | C(108)-C(103)-C(104) | 122 |        |        |
|               |      | C(103)-C(104)-C(105) | 120 |        |        |
|               |      | C(104)-C(105)-C(106) | 120 |        |        |
|               |      | C(105)-C(106)-C(107) | 120 |        |        |
|               |      | C(106)-C(107)-C(108) | 122 |        |        |
|               |      | C(107)-C(108)-C(109) | 122 |        |        |
|               |      | C(103)-C(104)-H(110) | 119 |        |        |
|               |      | C(104)-C(105)-H(111) | 120 |        |        |
|               |      | C(105)-C(106)-H(112) | 120 |        |        |
|               |      | C(106)-C(107)-H(113) | 120 |        |        |
|               |      | C(108)-C(109)-H(114) | 118 |        |        |
|               |      | C(108)-C(109)-C(115) | 125 |        |        |
|               |      | C(109)-C(115)-C(116) | 120 |        |        |
|               |      | C(115)-C(116)-O(117) | 116 |        |        |
|               |      | O(118)-C(116)-O(117) | 121 |        |        |
|               |      | C(115)-C(116)-O(118) | 123 |        |        |
|               |      | C(116)-O(117)-H(119) | 112 |        |        |
|               |      | C(109)-C(115)-H(120) | 122 |        |        |
